# Supplementary material for: Fetal Calf Serum Exerts an Inhibitory Effect on Replication of Duck Hepatitis A Virus Genotype 1 in Duck Embryo Fibroblast Cells
Source: MDPI journal article supplement (doi:10.3390/v12010080), 2020-01-09
Supplement: s1 [file s1]

Supplementary Figure 1

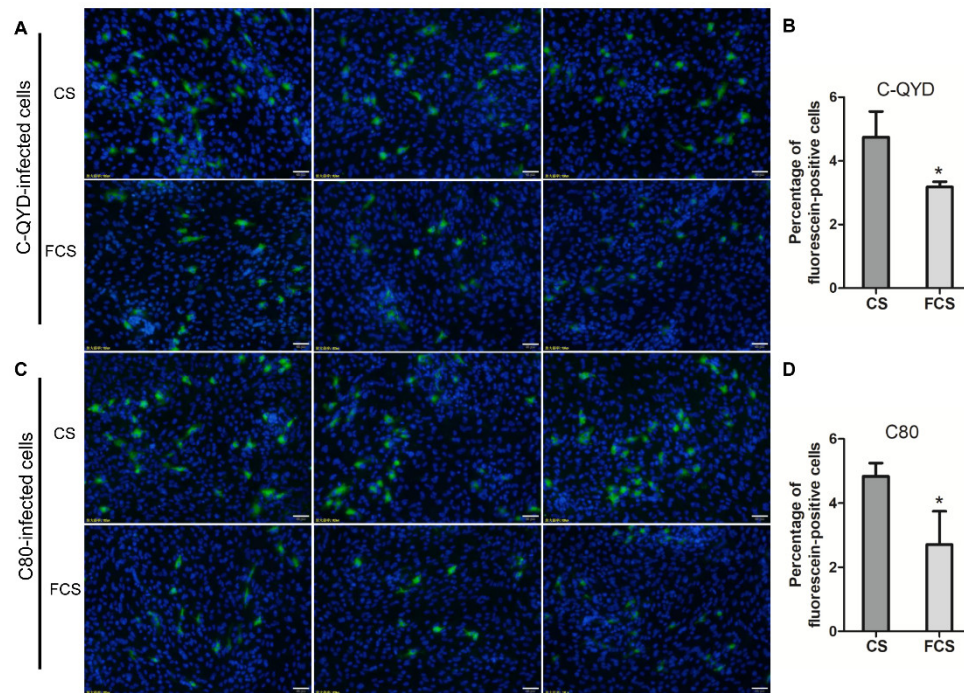

**Figure S1.** Immunofluorescent staining of DHAV-1-infected DEF cells at 24 h post-inoculation. The fifth cell passages of C-QYD (A) and C80 (C) cultured in 2% CS DMEM and 2% FCS DMEM were employed. Upper panel, 2% CS DMEM served as maintenance medium; lower panel, 2% FCS DMEM served as maintenance medium. The images were taken from three technical replicates. The percentage of fluorescein-positive cells derived from C-QYD (B) and C80 (D) infected groups was determined by counting fluorescein- and DAPI-positive nuclei. Bar = 50  $\mu$ m. Error bars represent the SD (n=3). \*,  $P<0.05$ .

Supplementary Figure 2

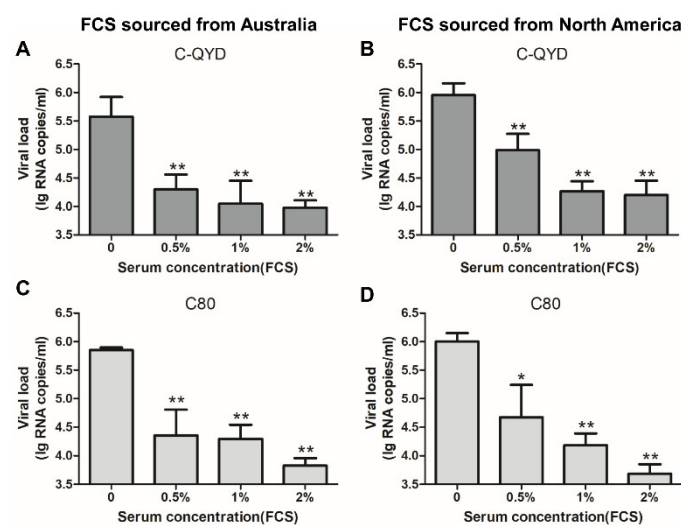

**Figure S2.** Analysis of effect of FCS sourced from Australia and North America on DHAV-1 replication. C-QYD and C80 strains were individually preincubated with three concentrations (0.5, 1, and 2%) of FCS sourced from Australia (A and C) and North America (B and D). DMEM-virus mixture was

included as control. Samples (cells + supernatant) were collected at 36 hpi for C-QYD and 24 hpi for C80, and viral load in each sample was quantified by RT-qPCR. Error bars represent the SD (n=3). \*,  $P<0.05$ . \*\*,  $P<0.01$ .
