# Supplementary material for: Fetal Calf Serum Exerts an Inhibitory Effect on Replication of Duck Hepatitis A Virus Genotype 1 in Duck Embryo Fibroblast Cells
Source: MDPI journal article supplement (doi:10.3390/v12010080), 2020-01-09
Supplement: s1 [file s1]

Supplementary Table 1

**Table S1.** Primers used in this study

| Primer <sup>a</sup> | Sequence (5'→3') <sup>b</sup>                        | Product length (bp) |
|---------------------|------------------------------------------------------|---------------------|
| qDHAV-1-f           | GGAGGTGGTGCTGAAATAT                                  | 214                 |
| qDHAV-1-r           | CATGTGCCTGGACAGAT                                    |                     |
| DHAV-1-5'UTR-f      | GTAATTGAAAGCGGGTGCATG                                | 632                 |
| C-QYD-5'UTR-r       | CATTGCATGAAAGCCTACTGGTAT                             |                     |
| C80-5'UTR-r         | CATTTTCATGAAAGTCTACTGGTATTATAGTG                     |                     |
| rDHAV-1-5'UTR-f     | caaaaatgaacaaatgtcgacGTAATTGAAAGCGGGTGCATG           | 674                 |
| rC-QYD-5'UTR-r      | gttttggcgtcttcgagctcCATTGCATGAAAGCCTACTGGTAT         |                     |
| rC80-5'UTR-r        | gttttggcgtcttcgagctcCATTTTCATGAAAGTCTACTGGTATTATAGTG |                     |

<sup>a</sup> f: forward primer; r: reverse primer.<sup>b</sup> lowercase letters represent homology arms necessary for homologous recombination.
